# Supplementary material for: Iodine-doped covalent organic frameworks with coaxially stacked cruciform anthracenes for high Hall mobility
Source: Royal Society of Chemistry journal article supplement (doi:10.1039/d2cc01721k), 2022-01-01
Supplement: d2cc01721k1.pdf [file d2cc01721k1.pdf]

## Supplementary Information

### **Iodine-Doped Covalent Organic Frameworks with Coaxially Stacked Cruciform Anthracenes for High Hall Mobility**

Yunyang Zhu,<sup>a</sup> Weijun Weng,<sup>a</sup> Ting Zhou,<sup>a</sup> Zheng Lin,<sup>a</sup> Ning Ding,<sup>a</sup> Phornphimon  
Maitarad,<sup>b</sup> Changchun Wanga and Jia Guo<sup>\*a</sup>

*<sup>a</sup>State Key Laboratory of Molecular Engineering of Polymers, Department of  
Macromolecular Science, Fudan University, Shanghai 200438, P. R. China.*

*<sup>b</sup>Research Center of Nano Science and Technology, Department of Chemistry,  
College of Science, Shanghai University, Shanghai 200444, P. R. China.*

*\*E-mail: guojia@fudan.edu.cn*

# 1. Materials and Methods

## 1.1 Materials

4,4,5,5-tetramethyl-2-[10-(tetramethyl-1,3,2-dioxaborolan-2-yl)anthracen-9-yl]-1,3,2-dioxaborolane was purchased from TCI chemicals. 5-bromobenzene-1,3-dicarbaldehyde was purchased from Bide pharmatech. Pd(PPh<sub>3</sub>)<sub>4</sub> was purchased from Energy Chemical. Iodine was purchased from Shanghai Macklin Biochemical Co., Ltd. K<sub>2</sub>CO<sub>3</sub> and all the solvents were purchased from Sinopharm Chemical Reagent Co., Ltd.

## 1.2 Characterizations

FT-IR spectra were recorded on a Nicolet 6700 (ThermoFisher, USA) Fourier transformation infrared spectrometer. UV-vis-NIR absorption spectra were collected on a Lambda 750 (Perkin-Elmer, USA) UV-vis-NIR spectrophotometer. Liquid <sup>1</sup>H NMR and <sup>13</sup>C NMR spectra were recorded on a Varian Mercury plus 400 MHz spectrophotometer at 298 K. Solid-state <sup>13</sup>C cross-polarization magic-angle-spinning (CP/MAS) NMR spectrum was collected on a Bruker 400M spectrophotometer. MALDI-TOF mass spectrum was collected on a 5800 (AB SCIEX, USA) MALDI-TOF mass spectrometer. Elemental Analysis was performed on an Elementar Varioel-III elementary analyzer. TGA experiment was performed on a Pyris 1 (PE, USA) Thermogravimetric analyzer. Powder X-ray diffraction (PXRD) spectra were collected on an X-ray diffraction spectrometer (Bruker D8 Advance, Germany) with Cu K $\alpha$  radiation at  $\lambda = 0.154$  nm operating at 40 kV and 40 mA. N<sub>2</sub> sorption isotherms were collected by a TriStar II 3020 volumetric adsorption analyzer (Micromeritics, USA) at 77K. Pore size distribution was calculated by data collected by an ASAP 2460 volumetric adsorption analyzer (Micromeritics, USA) at 77K. The samples were degassed at 120°C for 12 h under vacuum condition before measurement. FESEM image was taken using an Ultra 55 (Zeiss, Germany) field emission scanning electron microscope. The ESR experiments were performed on a Bruker a300 ESR

spectrometer. The Mott-Schottky plots and I-V curves were collected on a CHI-760 electrochemical workstation. Hall Measurements were finished on a PPMS-9 Hall effect tester. Electroconductivity was measured on a ST2263 double testing digital four-probe tester. Sample of 40 mg was transferred to a pressing die and pressed under the pressure of 28 MPa for 10 min. The sample was shaped as a cylindrical pellet with the diameter of 1.3 cm and thickness of 0.2 mm. The pellets were used to perform conductivity tests, Hall measurements and I-V tests afterwards.

## 1.3 Synthesis

### 1.3.1 Synthesis of 9,10-bis(3,5-diformyl-phenyl)-anthracene (BDFPA) **1**

A suspension of 4,4,5,5-tetramethyl-2-[10-(tetramethyl-1,3,2-dioxaborolan-2-yl)anthracen-9-yl]-1,3,2-dioxaborolane (2.1512 g, 5mmol), 5-bromobenzene-1,3-dicarbaldehyde (2.5000 g, 11.80 mmol, 2.36 equiv.),  $K_2CO_3$  (1.3182 g, 5 mmol),  $Pd(PPh_3)_4$  (500 mg, 0.43 mmol) in toluene/ $H_2O$  (4:1, 150 mL) was added into a 250 mL Schlenk flask and degassed by three freeze-pump-thaw cycles. Then the mixture was stirred at 95°C for 24 h. Liquid in the mixture was removed by rotary evaporation. The remnant solid was dispersed in  $CH_2Cl_2$  (180 mL) and washed by brine (500 mL $\times$ 4). The obtained yellow liquid was dried by anhydrous  $Na_2SO_4$ . After filtration, the crude was concentrated by rotary evaporation and purified by column chromatography (ethyl acetate: petroleum ether =1:8) to give **1** (228 mg, 10% yield) as yellow solid.  $^1H$  NMR (400 MHz,  $CDCl_3$ , PPM):  $\delta$  7.42(dd, 4H, J=3.35 Hz), 7.55(dd, 4H, J=3.35 Hz), 8.29(s, 4H), 8.62(s, 2H), 10.26(s, 4H);  $^{13}C$  NMR (400 MHz,  $CDCl_3$ , PPM):  $\delta$  126.37, 126.38, 129.80, 130.14, 134.91, 137.56, 137.60, 141.30, 191.05; MALDI-TOF MS: m/z calculated: 442.12 (M), 443.12 (M+H); found: 442.18 (M), 443.18 (M+H).

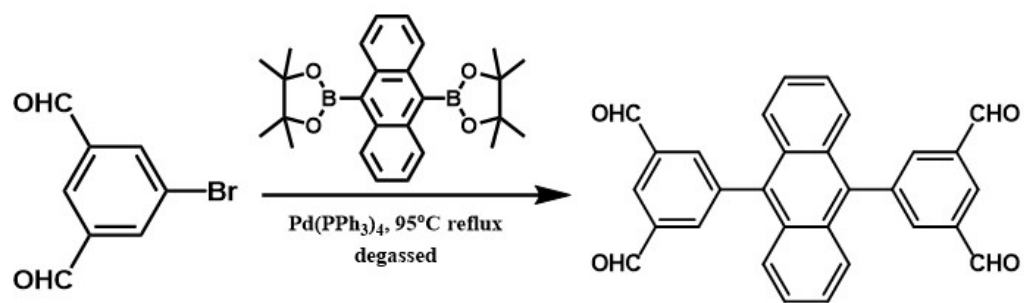

**Scheme S1.** Synthesis of compound **1**.

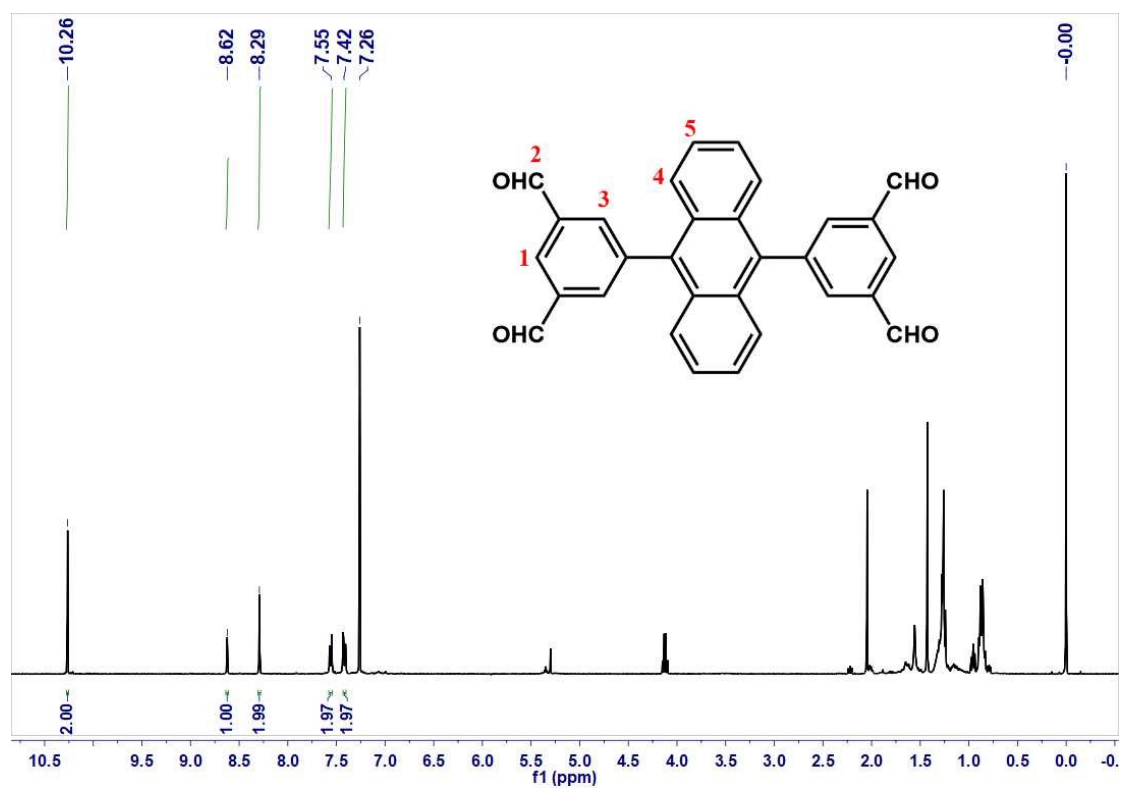

**Figure S1.** <sup>1</sup>H NMR spectrum of compound **1**.

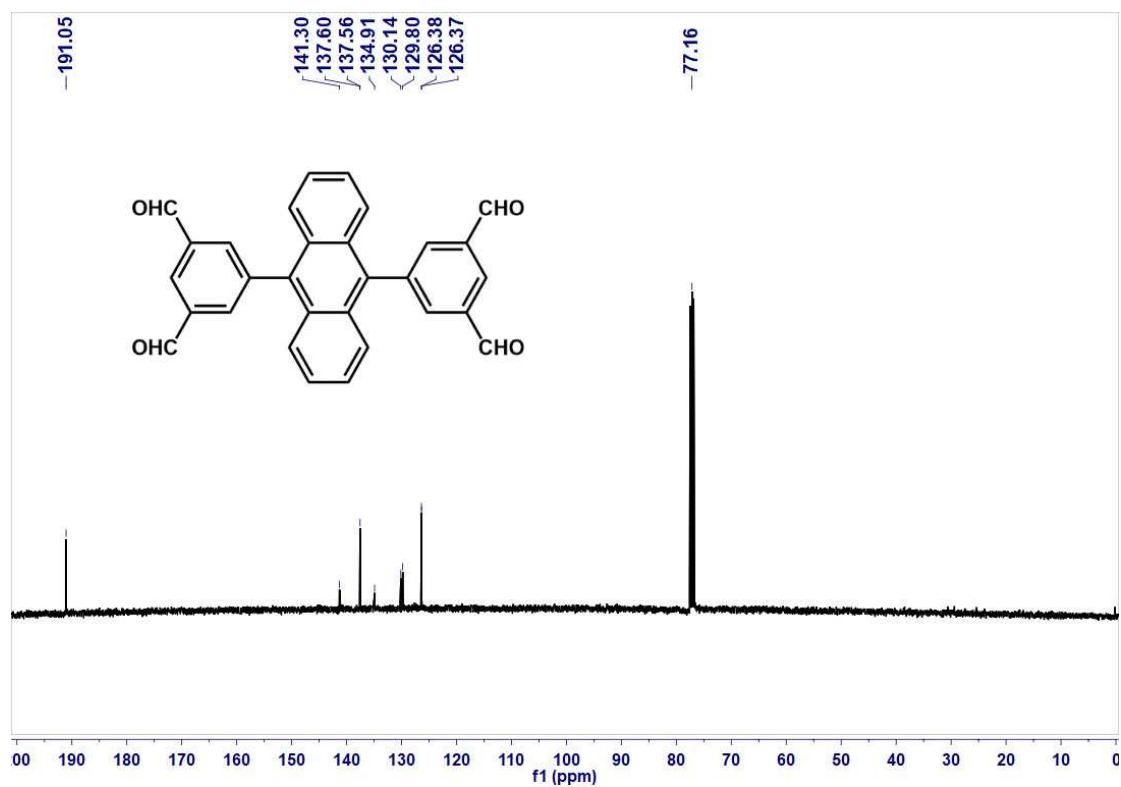

Figure S2.  $^{13}\text{C}$  NMR spectrum of compound 1.

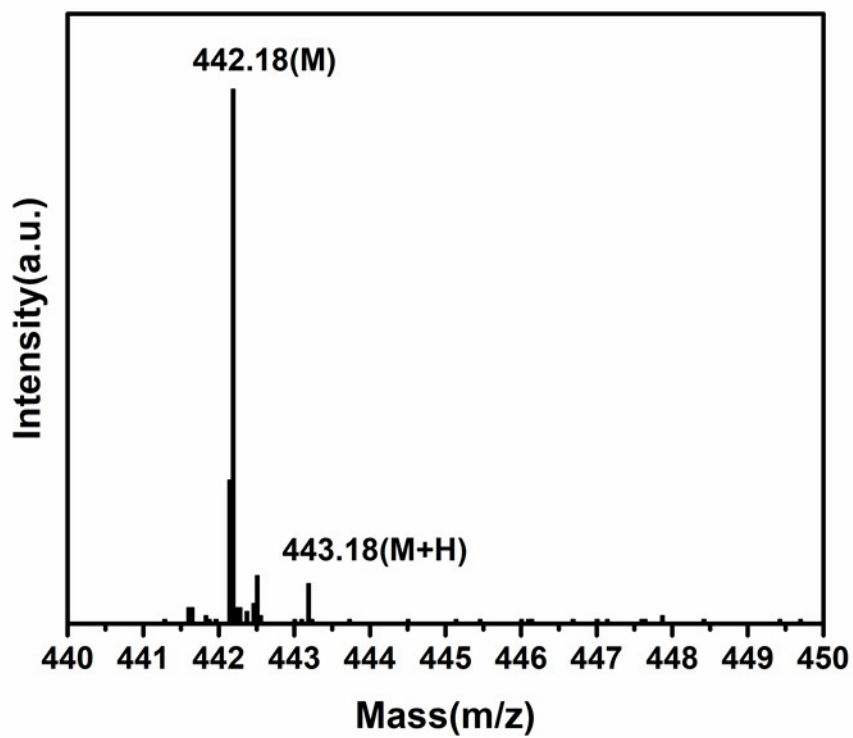

Figure S3. MALDI-TOF MS of compound 1.

### 1.3.2 Synthesis of AnPD-COF

BDFPA (20.46mg, 0.0463mmol), p-phenylenediamine (10mg, 0.0926mmol) were charged into a Pyrex tube (10 cm×1 cm) and a mixture of 0.5 mL mesitylene and 0.5 mL ethanol. Then 0.1 mL 6M acetic acid (HOAc) aqueous solution was added. After sonication for 10 min, the reaction solution was subjected to three freeze-pump-thaw cycles and the Pyrex tube was sealed off. The reaction proceeded at 120°C for 3 days. After cooled to room temperature, the solids were collected by filtration and washed by water, ethanol and THF. The monomers and oligomers were further removed by Soxhlet extraction with THF for 24 h. The obtained solids were dried at 40°C in vacuum for 48 h, giving a yield of 82%.

### 1.3.3 Synthesis of Poly-AnPD

BDFPA(20.46mg, 0.0463mmol), p-phenylenediamine (10mg, 0.0926mmol) were charged into a Pyrex tube (10 cm×1cm) and mixed with 0.5 mL mesitylene and 0.5 mL dioxane. Then 0.1 mL 6M acetic acid (HOAc) aqueous solution was added. After sonication for 10 min, the reaction solution was subjected to three freeze-pump-thaw cycles and the Pyrex tube was sealed off. The reaction proceeded at 120°C for 3 days. After cooled to room temperature, the solids were collected by filtration, washed by water, ethanol and THF, and extracted by Soxhlet with THF for 24 h. The obtained solids were dried at 40°C under vacuum for 48 h, giving a yield of 90%.

### 1.3.4 Synthesis of TFB-Bp-COF

The synthesis of TFB-Bp-COF is following the method in a reported article<sup>1</sup>. 1,3,5-triformylbenzene (TFB, 24.3mg, 0.15 mmol), benzidine (Bp for biphenyl, 41.5mg, 0.225mmol) were charged into a Pyrex tube (10 cm×1cm) and mixed with 0.75mL mesitylene and 0.75mL dioxane. Then 0.15 mL 6M acetic acid (HOAc) aqueous solution was added. After sonication for 10 min, the reaction solution was subjected to three freeze-pump-thaw cycles and the Pyrex tube was sealed off. The reaction proceeded at 120°C for 3 days. After cooled to room temperature, the solids were

collected by filtration, washed by water, ethanol and THF, and extracted by Soxhlet with THF for 24 h. The obtained solids were dried at 40°C under vacuum for 48 h, giving a yield of 85%.

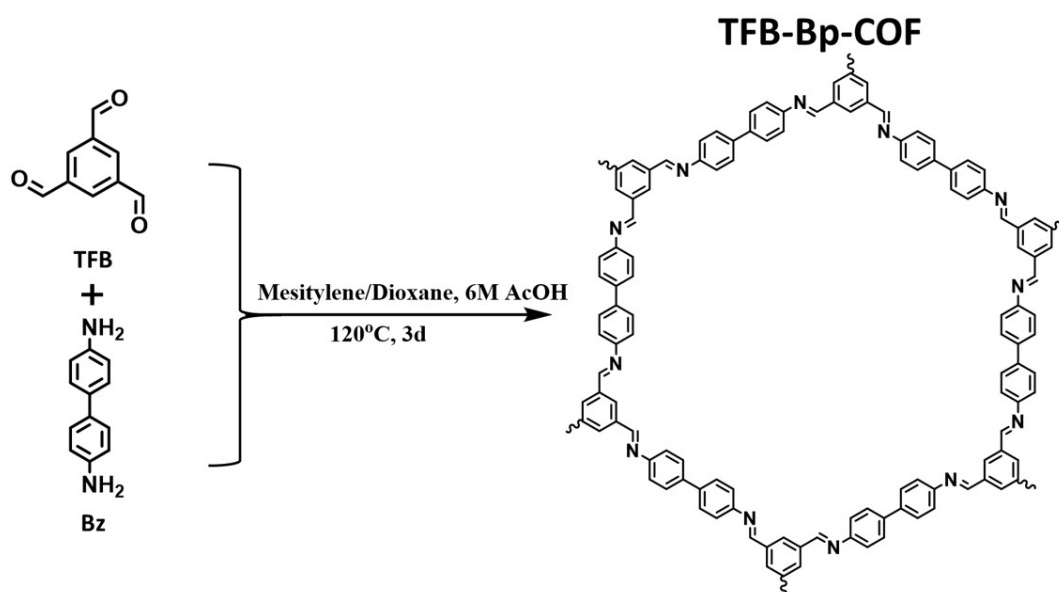

**Scheme S2.** Synthesis of TFB-Bp-COF.

### 1.3.5 Iodine doping of samples.

30 mg of pristine sample in a small bottle was placed inside a larger jar containing 2 g of iodine. The jar was heated to 50°C and the doping was monitored by the change of sample weight. After 48 h, there was negligible change henceforth and the doping was over.

### 1.3.6 Iodine removal of AnPD-COF.

20mg of iodine-doped AnPD-COF was dispersed in EtOH. The COF powder was washed with excessive EtOH and collected by filtration. The obtained solids were dried at 40°C in vacuum for 48 h.

## 1.4 Structural Modelling and Refinement

Stacking structures were built and fully optimized with the QEq charge equation by the Forcite Module of Material Studio Software. And the Pawley refinement of the experimental PXRD pattern was calculated using the Reflex Module.

## **1.5 Calculation of Ionization Potentials**

The DFT calculations were performed by Gaussian 16 package<sup>2</sup> on the level of M062X/def2TZVP<sup>3</sup>, involving the D3 version of Grimme's dispersion correction<sup>4</sup>. The structural models were cutout from the crystal structure of the reported literature<sup>1</sup> and this work for further optimization. The ionization potentials were calculated by the following equation<sup>5</sup>:

Vertical Ionization Potential = Energy of Cation Species – Energy of Neutral Species  
where cation species and neutral species were both optimized in the neutral state.



## 2. Figures and Tables

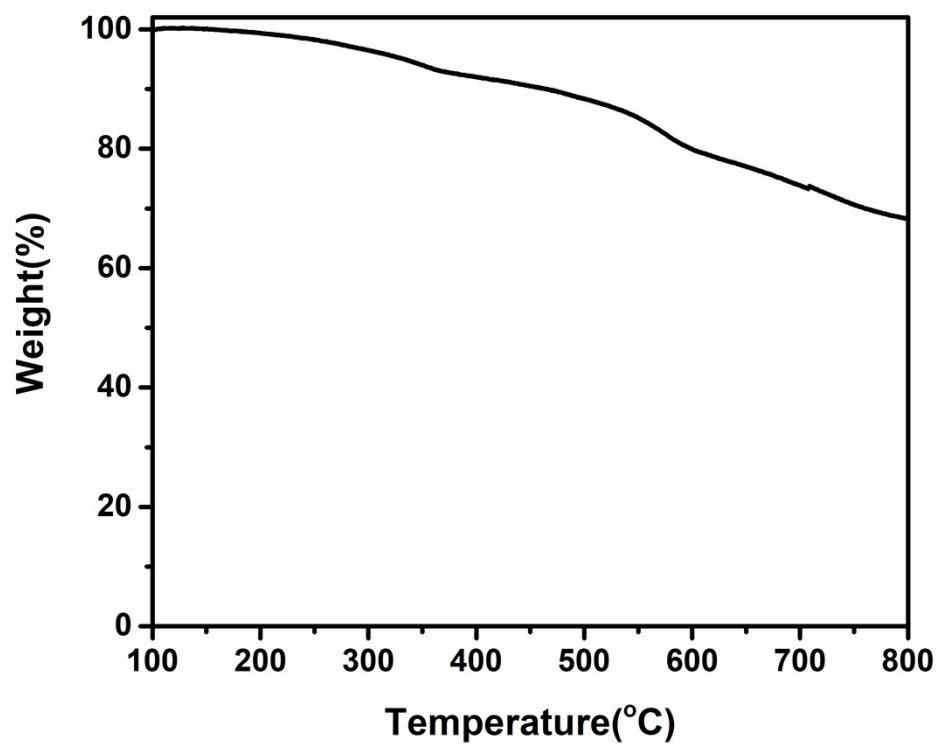

Figure S4. TGA curve of AnPD-COF.

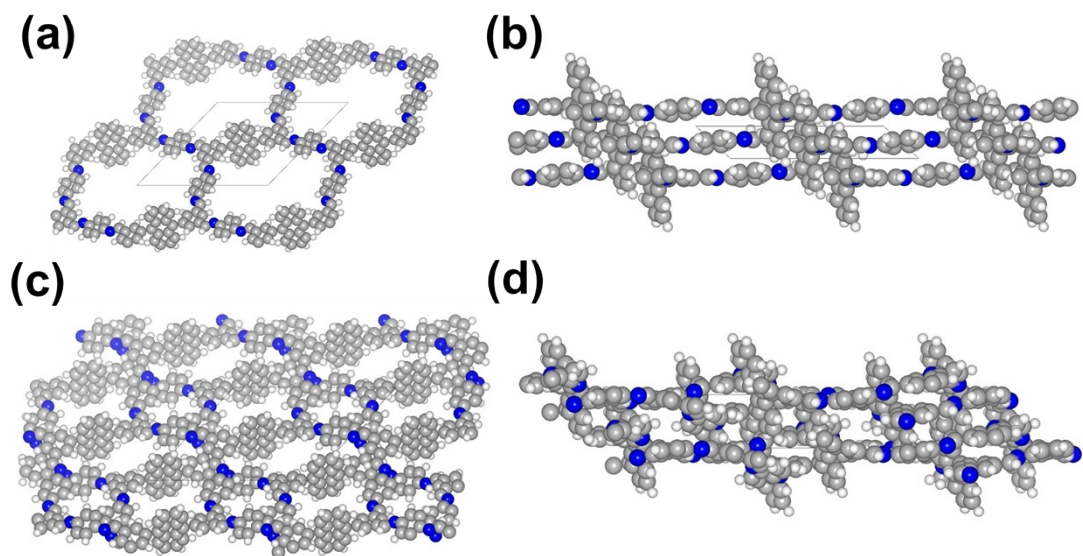

**Figure S5.** Models of AnPD-COF with two kinds of stacking modes. (a) top and (b) side view of AA stacking mode. (c) top and (d) side view of AB stacking mode. carbon: gray; Nitrogen: blue; Hydrogen: white.

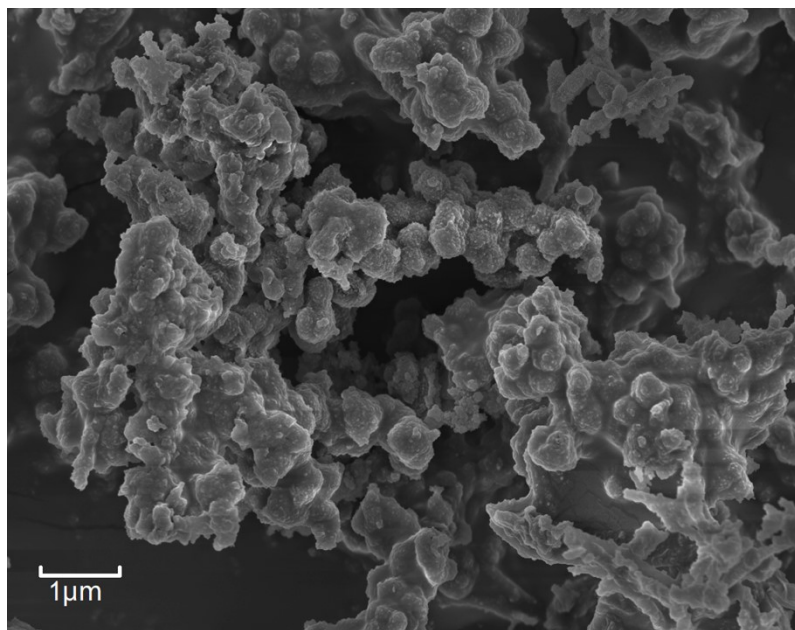

**Figure S6.** FE SEM image of AnPD-COF.

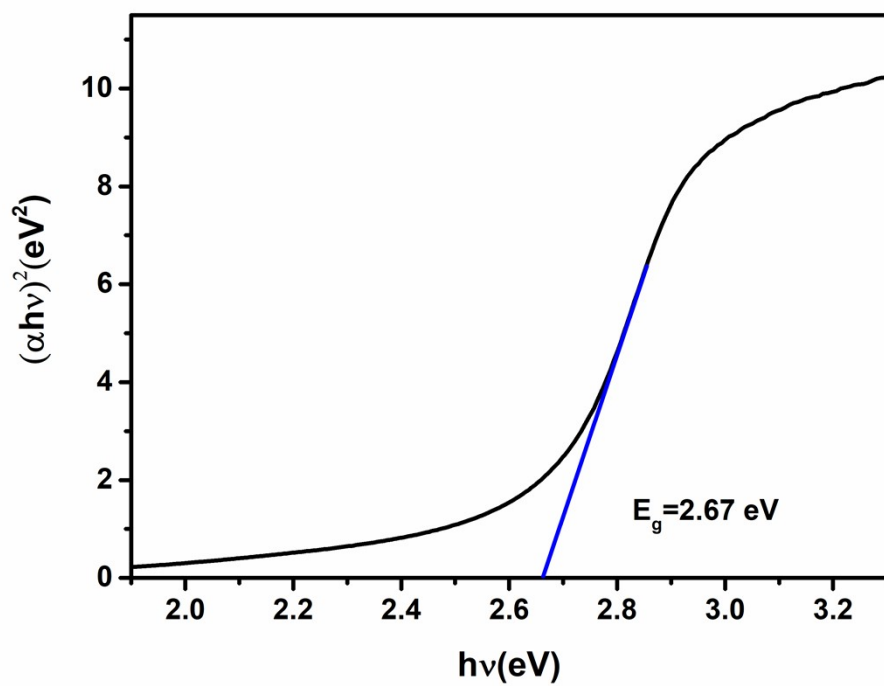

**Figure S7.** Tauc plot of AnPD-COF.

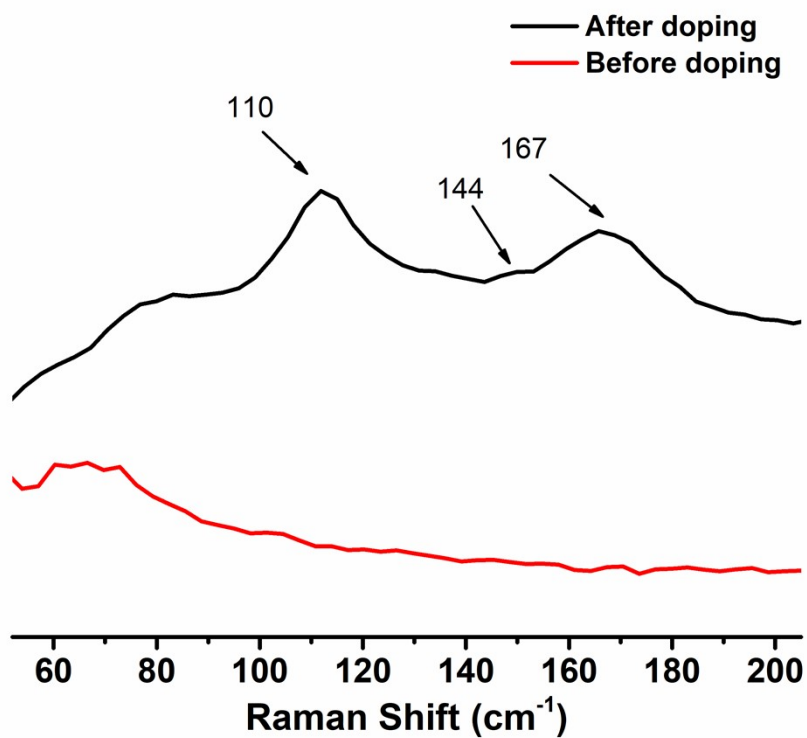

**Figure S8.** Raman spectra of AnPD-COF and I<sub>2</sub>-doped AnPD-COF. After iodine doping, the newly emerging peaks appeared at 110, 144, and 167 cm<sup>-1</sup>, which can be assigned to the perturbed iodine molecules, anionic I<sub>3</sub><sup>-</sup>, and I<sub>5</sub><sup>-</sup> species, respectively.

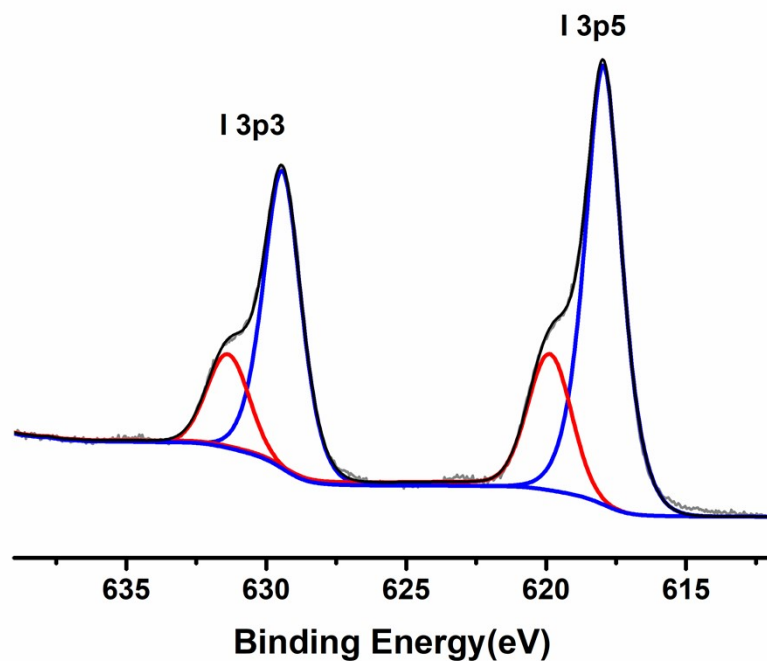

**Figure S9.** I 3p XPS spectrum of I<sub>2</sub>-doped AnPD-COF. The two peaks of I 3p3 and I 3p5 can be deconvoluted into two single peaks, respectively, of which the two peaks marked with blue correspond to the anionic species and the other two marked with red are attributed to the surface iodine adatoms.

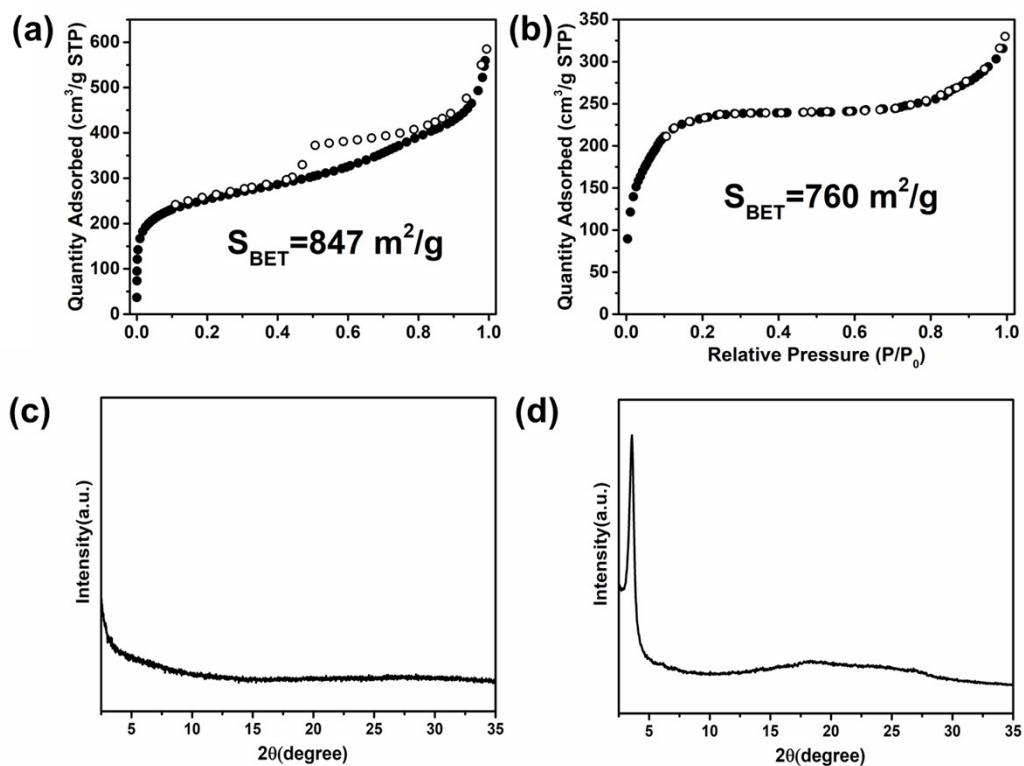

**Figure S10.** N<sub>2</sub> sorption isotherms and PXRD patterns of Poly-AnPD (a,c) and TFB-Bp-COF(b,d).

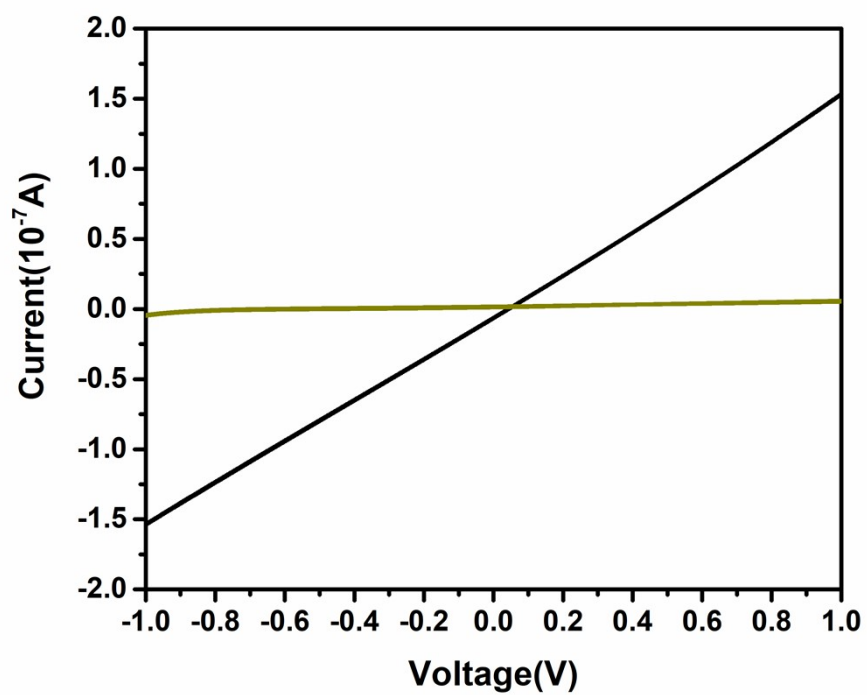

**Figure S11.** I-V curves of Poly-AnPD before and after doping. Yellow: before doping. Black: after doping.



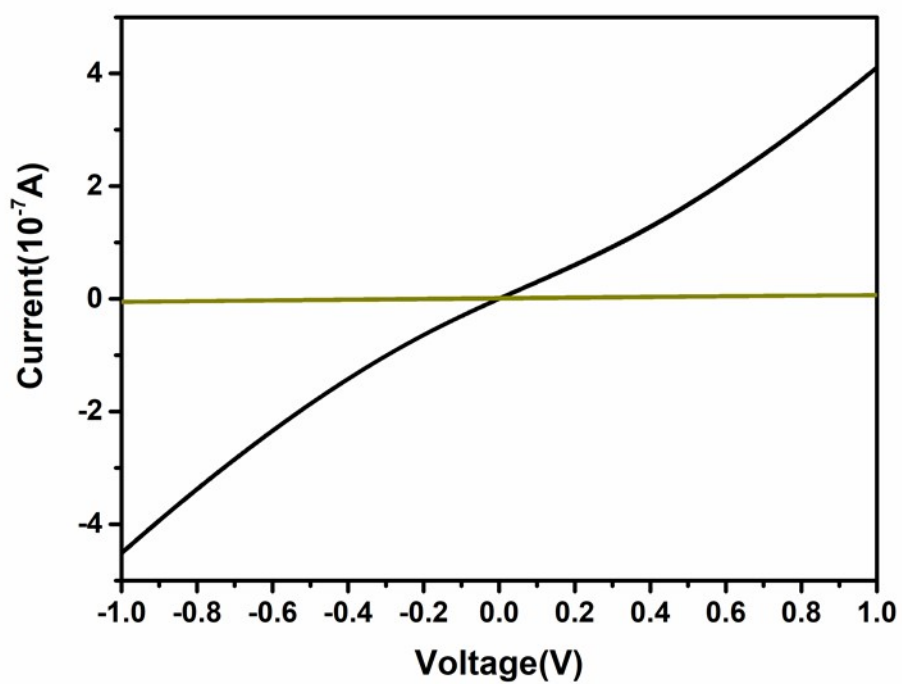

**Figure S12.** I-V curves of TFB-Bp-COF before and after doping. Yellow: before doping. Black: after doping.

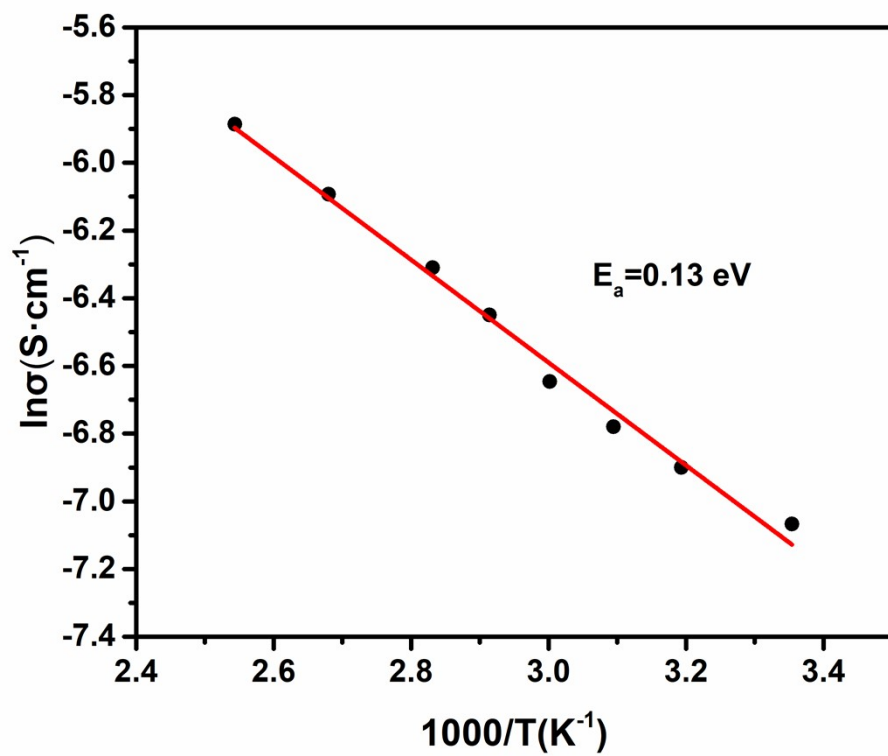

**Figure S13.** Arrhenius plot of conductivity vs. temperature for  $\text{I}_2$ -doped AnPD-COF. The activation energy was calculated to be 0.13 eV.

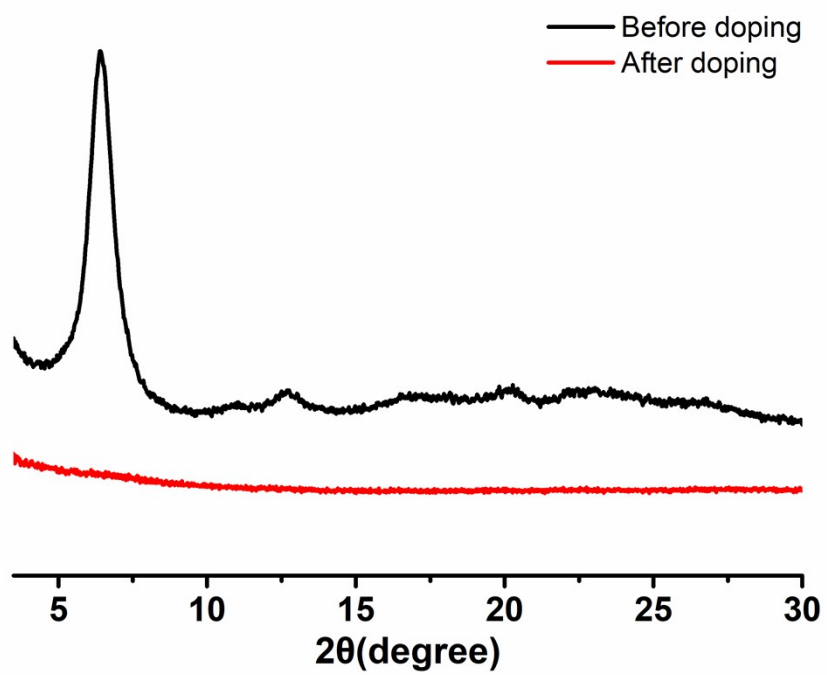

**Figure S15.** PXRD pattern comparison of AnPD-COF before and after iodine doping.

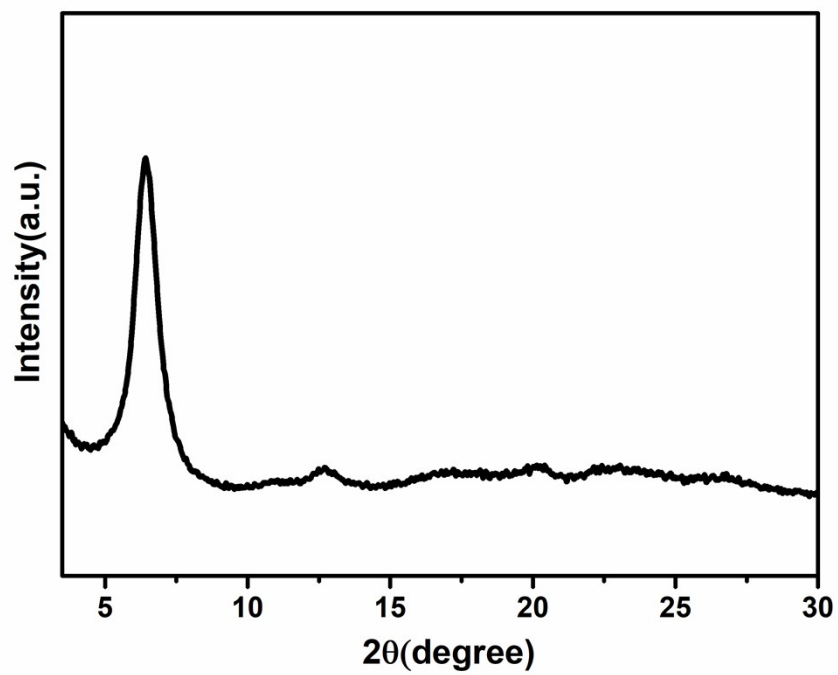

**Figure S16.** PXRD pattern of the remaining AnPD-COF after removal of the doped iodine.

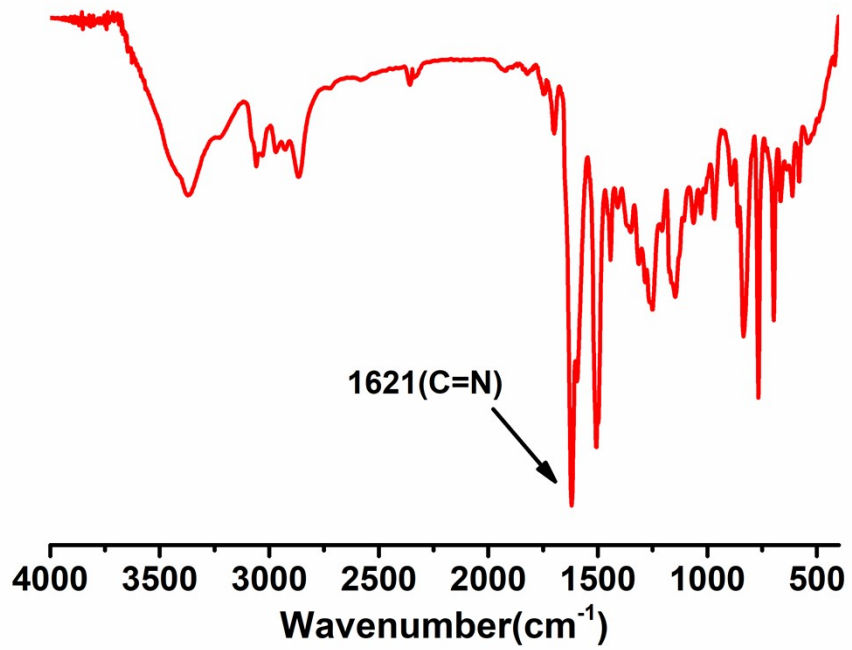

**Figure S17.** FT-IR spectrum of the remaining AnPD-COF after removal of the doped iodine.

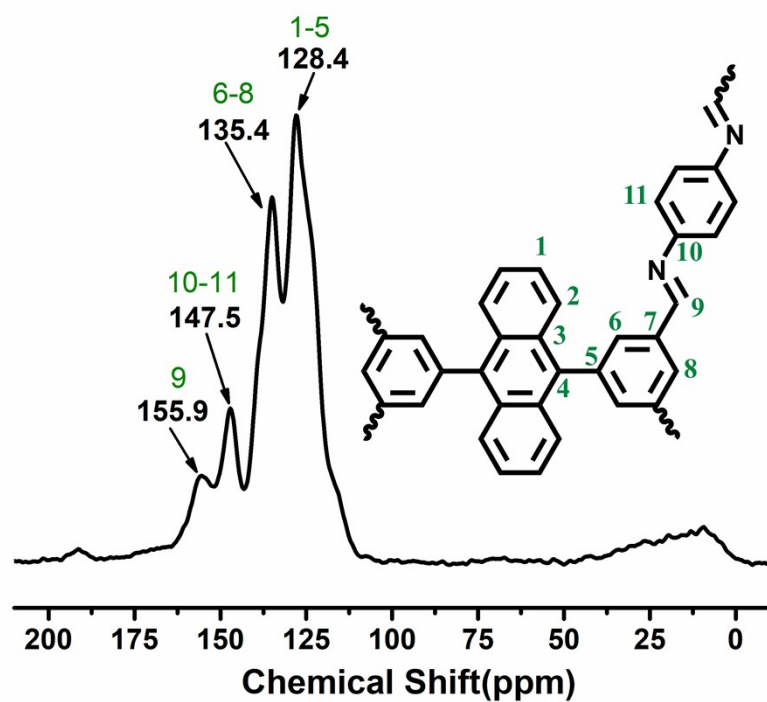

**Figure S18.** Solid-state CP/MAS  $^{13}\text{C}$  NMR spectrum of the remaining AnPD-COF after removal of the doped iodine.

**Table S1.** Elemental analysis (EA) of AnPD-COF.

|            | C (wt%) | H (wt%) | N (wt%) | C/N molar ratio |
|------------|---------|---------|---------|-----------------|
| EA         | 77.79   | 5.19    | 8.03    | 11.30           |
| calculated | 85.98   | 4.47    | 9.55    | 10.50           |

**Table S2.** Fractional atomic coordinates of the unit cell for AnPD-COF.

---

AnPD-COF:  
AA stacking  
Space Group: P1  
 $a = 18.89016 \pm 0.15944 \text{ \AA}$ ,  $b = 16.94669 \pm 0.14445 \text{ \AA}$ ,  $c = 5.97109 \pm 0.05087 \text{ \AA}$   
 $\alpha = 127.24326 \pm 0.02087^\circ$ ,  $\beta = 61.46254 \pm 0.02874^\circ$ ,  $\gamma = 78.97743 \pm 0.02660^\circ$

---

| atom | x            | y           | z            |
|------|--------------|-------------|--------------|
| C1   | -0.565046599 | 0.47674517  | 0.575512374  |
| C2   | -0.477710276 | 0.415924976 | 0.122993692  |
| C3   | -0.41057279  | 0.43710284  | 0.046524841  |
| C4   | -0.432129105 | 0.520311322 | 0.424672761  |
| C5   | -0.51946427  | 0.581102423 | 0.877056181  |
| C6   | -0.586590966 | 0.559946102 | 0.953570973  |
| C7   | -0.671544017 | 0.623020103 | 1.414194957  |
| C8   | -0.680808988 | 0.685646331 | 1.764735396  |
| C9   | -0.615075876 | 0.705588194 | 1.689274795  |
| C10  | -0.542605055 | 0.661970798 | 1.265007447  |
| C11  | -0.325630896 | 0.374012556 | -0.414141439 |
| C12  | -0.316345952 | 0.311377099 | -0.764706624 |
| C13  | -0.382097456 | 0.291439593 | -0.689188517 |
| C14  | -0.454549208 | 0.335067467 | -0.264959882 |
| C15  | -0.627657536 | 0.445355268 | 0.629526387  |
| C16  | -0.369493569 | 0.551681343 | 0.370533953  |
| C17  | -0.604428968 | 0.360438377 | 0.620070742  |
| C18  | -0.650312512 | 0.31565658  | 0.5986436    |
| C19  | -0.719212569 | 0.355457981 | 0.578234654  |
| C20  | -0.746410053 | 0.443430359 | 0.599759434  |
| C21  | -0.701281735 | 0.487822328 | 0.631536791  |
| C22  | -0.295882323 | 0.509226056 | 0.368566163  |
| C23  | -0.250726125 | 0.553577505 | 0.40017365   |
| C24  | -0.277905109 | 0.64152668  | 0.421600482  |
| C25  | -0.346832376 | 0.681363638 | 0.401279824  |
| C26  | -0.392728926 | 0.636586794 | 0.379961453  |
| C27  | -0.819982704 | 0.486276075 | 0.586288524  |
| N28  | -0.863788671 | 0.44705471  | 0.581114307  |
| C29  | -0.623293818 | 0.225135841 | 0.576670546  |
| N30  | -0.559379466 | 0.183819615 | 0.596014487  |
| C31  | -0.373831241 | 0.771857928 | 0.423204466  |
| N32  | -0.437753755 | 0.8131965   | 0.403923598  |
| C33  | -0.177142102 | 0.510733664 | 0.413646138  |
| N34  | -0.13332802  | 0.549943657 | 0.418689758  |
| C35  | -0.932662015 | 0.479706092 | 0.555216535  |

---



|     |              |             |              |
|-----|--------------|-------------|--------------|
| C36 | -0.53354828  | 0.094188044 | 0.558252329  |
| C37 | -0.064451727 | 0.517296553 | 0.444561543  |
| C38 | -0.463572858 | 0.90281556  | 0.441661747  |
| C39 | -0.973110324 | 0.565111465 | 0.568658835  |
| C40 | -0.961285576 | 0.415618351 | 0.493317228  |
| C41 | -0.558717002 | 0.029155128 | 0.426672214  |
| C42 | -0.47309153  | 0.061401617 | 0.629948048  |
| C43 | -0.438400191 | 0.967852562 | 0.573244548  |
| C44 | -0.524038975 | 0.935599058 | 0.369933895  |
| C45 | -0.023996229 | 0.431883077 | 0.431106906  |
| C46 | -0.035823185 | 0.581387871 | 0.506454026  |
| H47 | -0.728559322 | 0.618833864 | 1.477856822  |
| H48 | -0.740779785 | 0.723838409 | 2.105459109  |
| H49 | -0.625038157 | 0.75863318  | 1.972038941  |
| H50 | -0.5007278   | 0.688046901 | 1.213014772  |
| H51 | -0.268596476 | 0.378202811 | -0.477801788 |
| H52 | -0.256390626 | 0.273193447 | -1.105345186 |
| H53 | -0.372121704 | 0.238397099 | -0.971915168 |
| H54 | -0.496439957 | 0.308988656 | -0.212899632 |
| H55 | -0.545815103 | 0.320926873 | 0.60010669   |
| H56 | -0.754912336 | 0.322202054 | 0.556445645  |
| H57 | -0.720623507 | 0.552759239 | 0.635161211  |
| H58 | -0.276548917 | 0.444295707 | 0.365037287  |
| H59 | -0.24218514  | 0.674782765 | 0.44329607   |
| H60 | -0.451333652 | 0.676102019 | 0.399963595  |
| H61 | -0.833275065 | 0.54865126  | 0.569719421  |
| H62 | -0.667430597 | 0.201722478 | 0.583457801  |
| H63 | -0.329677102 | 0.79525789  | 0.41631614   |
| H64 | -0.163874919 | 0.448393836 | 0.430327794  |
| H65 | -0.955682318 | 0.618541897 | 0.628777767  |
| H66 | -0.930856784 | 0.352033729 | 0.493877079  |
| H67 | -0.607811725 | 0.053347437 | 0.382111051  |
| H68 | -0.448066954 | 0.106149338 | 0.700607805  |
| H69 | -0.389317417 | 0.943659409 | 0.617769193  |
| H70 | -0.549053255 | 0.89085748  | 0.299273171  |
| H71 | -0.041425637 | 0.378462956 | 0.371000974  |
| H72 | -0.066251337 | 0.644964106 | 0.505888349  |

---

**Table S3.** Comparison of activation energy ( $E_a$ ).

| COFs        | Dopant | $E_a$ (eV) | Ref.       |
|-------------|--------|------------|------------|
| AnPD-COF    | Iodine | 0.13       | This work  |
| ZnPc-pz COF | -      | 0.32       | Ref. [S6]  |
| CuPc-pz COF | -      | 0.37       | Ref. [S6]  |
| ZnPc-pz COF | Iodine | 0.21       | Ref. [S7]  |
| TANG-COF    | Iodine | <0.01      | Ref. [S8]  |
| JUC-518     | Iodine | 0.42       | Ref. [S9]  |
| JUC-519     | Iodine | 0.20       | Ref. [S9]  |
| NiPc-CoTAA  | -      | 0.33       | Ref. [S10] |

**Table S4.** The comparison of carrier mobility values of different COFs.

| COFs                 | Dopant | Method <sup>a</sup> | Hole Mobility<br>(cm <sup>2</sup> V <sup>-1</sup> s <sup>-1</sup> ) | Electron Mobility<br>(cm <sup>2</sup> V <sup>-1</sup> s <sup>-1</sup> ) | Ref.       |
|----------------------|--------|---------------------|---------------------------------------------------------------------|-------------------------------------------------------------------------|------------|
| AnPD-COF             | Iodine | Hall effect         | 10.5                                                                | -                                                                       | This work  |
| AnPD-COF             | -      | Hall effect         | 0.7                                                                 | -                                                                       | This work  |
| ZnPc-pz COF          | Iodine | Hall effect         | 22                                                                  | -                                                                       | Ref. [S7]  |
| ZnPc-pz COF          | -      | Hall effect         | 4.8                                                                 | -                                                                       | Ref. [S6]  |
| CuPc-pz COF          | Iodine | Hall effect         | 7                                                                   | -                                                                       | Ref. [S7]  |
| CuPc-pz COF          | -      | Hall effect         | 0.9                                                                 | -                                                                       | Ref. [S7]  |
| BUCT-COF-4           | Iodine | Hall effect         | -                                                                   | 2.62                                                                    | Ref. [S11] |
| BUCT-COF-4           | -      | Hall effect         | -                                                                   | 1.97                                                                    | Ref. [S11] |
| TTF-Ph-COF           | -      | FP-TRMC             | 0.2                                                                 | -                                                                       | Ref. [S12] |
| TTF-Py-COF           | -      | FP-TRMC             | 0.08                                                                | -                                                                       | Ref. [S12] |
| COF-366              | -      | FP-TRMC             | 8.1                                                                 | -                                                                       | Ref. [S13] |
| COF-66               | -      | FP-TRMC             | 3.0                                                                 | -                                                                       | Ref. [S13] |
| CS-COF               | -      | FP-TRMC             | 4.2                                                                 | -                                                                       | Ref. [S14] |
| H <sub>2</sub> P-COF | -      | FP-TRMC             | 3.5                                                                 | -                                                                       | Ref. [S15] |
| ZnP-COF              | -      | FP-TRMC             | 0.032                                                               | 0.016                                                                   | Ref. [S15] |
| CuP-COF              | -      | FP-TRMC             | -                                                                   | 0.19                                                                    | Ref. [S15] |
| NiPc COF             | -      | FP-TRMC             | 1.3                                                                 | -                                                                       | Ref. [S16] |
| HBC-COF              | -      | FP-TRMC             | 0.7                                                                 | -                                                                       | Ref. [S17] |
| 2D-NiPc-BTDA COF     | -      | FP-TRMC             | -                                                                   | 0.6                                                                     | Ref. [S18] |
| 2D D-A COF           | -      | FP-TRMC             | 0.01                                                                | 0.04                                                                    | Ref. [S19] |

<sup>a</sup>Hall effect method and flash-photolysis time-resolved microwave conductivity (FP-TRMC)

**Table S5.** The comparison of the BET surface area of AnPD-COF, Poly-AnPD, and TFB-Bp-COF.

| Sample     | $S_{\text{BET}}(\text{m}^2 \text{g}^{-1})$ |
|------------|--------------------------------------------|
| AnPD-COF   | 725                                        |
| Poly-AnPD  | 847                                        |
| TFB-Bp-COF | 760                                        |

**Table S6.** The comparison of the doped iodine contents in the different samples.

| sample     | weight (wt%) |
|------------|--------------|
| AnPD-COF   | 140.4        |
| Poly-AnPD  | 144.1        |
| TFB-Bp-COF | 143.5        |

**Table S7.** Calculations of IPs for the various models.

| Model     | Neutral(hatree) | Cation(hatree) | IP(hatree) | IP(eV) |
|-----------|-----------------|----------------|------------|--------|
| Dp        | -463.261715     | -462.956608    | 0.305107   | 8.30   |
| Dp-dimer  | -926.528676     | -926.250958    | 0.277718   | 7.56   |
| Ant       | -1001.549833    | -1001.293022   | 0.256811   | 6.99   |
| Ant-dimer | -2003.083083    | -2002.849642   | 0.233441   | 6.35   |

## Reference

- [S1] Q. Gao, L. Bai, Y. Zeng, P. Wang, X. Zhang, R. Zou and Y. Zhao, *Chem. Eur. J.*, 2015, **21**, 16818-16822.
- [S2] M. J. Frisch, G. W. Trucks, H. B. Schlegel, G. E. Scuseria, M. A. Robb, J. R. Cheeseman, G. Scalmani, V. Barone, G. A. Petersson, H. Nakatsuji, X. Li, M. Caricato, A. V. Marenich, J. Bloino, B. G. Janesko, R. Gomperts, B. Mennucci, H. P. Hratchian, J. V. Ortiz, A. F. Izmaylov, J. L. Sonnenberg, D. Williams-Young, F. Ding, F. Lipparini, F. Egidi, J. Goings, B. Peng, A. Petrone, T. Henderson, D. Ranasinghe, V. G. Zakrzewski, J. Gao, N. Rega, G. Zheng, W. Liang, M. Hada, M. Ehara, K. Toyota, R. Fukuda, J. Hasegawa, M. Ishida, T. Nakajima, Y. Honda, O. Kitao, H. Nakai, T. Vreven, K. Throssell, J. A. Montgomery, Jr., J. E. Peralta, F. Ogliaro, M. J. Bearpark, J. J. Heyd, E. N. Brothers, K. N. Kudin, V. N. Staroverov, T. A. Keith, R. Kobayashi, J. Normand, K. Raghavachari, A. P. Rendell, J. C. Burant, S. S. Iyengar, J. Tomasi, M. Cossi, J. M. Millam, M. Klene, C. Adamo, R. Cammi, J. W. Ochterski, R. L. Martin, K. Morokuma, O. Farkas, J. B. Foresman, and D. J. Fox, Gaussian16, Revision A.03, Gaussian, Inc.:Wallingford CT, 2016.
- [S3] Zhao, Y.; Truhlar, D. G., *Theor. Chem. Acc.*, 2008, 120, 215; Florian Weigend and Reinhart Ahlrichs, *Phys. Chem. Chem. Phys.*, 2005, 7, 3297-3305.
- [S4] S. Grimme, S. Ehrlich, L. Goerigk, *J. Comput. Chem.*, 2011, **32**, 1456-1465.
- [S5] T. Vikramaditya and S. T. Lin, *J. Comput. Chem.*, 2017, **38**, 1844-1852.
- [S6] M. Wang, M. Ballabio, M. Wang, H. H. Lin, B. P. Biswal, X. Han, S. Paasch, E. Brunner, P. Liu, M. Chen, M. Bonn, T. Heine, S. Zhou, E. Canovas, R. Dong and X. Feng, *J. Am. Chem. Soc.*, 2019, **141**, 16810-16816.
- [S7] M. Wang, M. Wang, H. H. Lin, M. Ballabio, H. Zhong, M. Bonn, S. Zhou, T. Heine, E. Canovas, R. Dong and X. Feng, *J. Am. Chem. Soc.*, 2020, **142**, 21622-21627.
- [S8] V. Lakshmi, C. H. Liu, M. Rajeswara Rao, Y. Chen, Y. Fang, A. Dadvand, E. Hamzehpoor, Y. Sakai-Otsuka, R. S. Stein and D. F. Perepichka, *J. Am. Chem. Soc.*, 2020, **142**, 2155-2160.

- [S9] H. Li, J. Chang, S. Li, X. Guan, D. Li, C. Li, L. Tang, M. Xue, Y. Yan, V. Valtchev, S. Qiu and Q. Fang, *J. Am. Chem. Soc.*, 2019, **141**, 13324-13329.
- [S10] Y. Yue, P. Cai, X. Xu, H. Li, H. Chen, H. C. Zhou and N. Huang, *Angew. Chem. Int. Ed.*, 2021, **60**, 10806-10813.
- [S11] S. Wang, X. X. Li, L. Da, Y. Wang, Z. Xiang, W. Wang, Y. B. Zhang and D. Cao, *J. Am. Chem. Soc.*, 2021, **143**, 15562-15566.
- [S12] S. Jin, T. Sakurai, T. Kowalczyk, S. Dalapati, F. Xu, H. Wei, X. Chen, J. Gao, S. Seki, S. Irle and D. Jiang, *Chem. Eur. J.*, 2014, **20**, 14608-14613.
- [S13] S. Wan, F. Gándara, A. Asano, H. Furukawa, A. Saeki, S. K. Dey, L. Liao, M. W. Ambrogio, Y. Y. Botros, X. Duan, S. Seki, J. F. Stoddart and O. M. Yaghi, *Chem. Mater.*, 2011, **23**, 4094-4097.
- [S14] J. Guo, Y. Xu, S. Jin, L. Chen, T. Kaji, Y. Honsho, M. A. Addicoat, J. Kim, A. Saeki, H. Ihee, S. Seki, S. Irle, M. Hiramoto, J. Gao and D. Jiang, *Nat. Commun.*, 2013, **4**, 2736.
- [S15] X. Feng, L. Liu, Y. Honsho, A. Saeki, S. Seki, S. Irle, Y. Dong, A. Nagai and D. Jiang, *Angew. Chem. Int. Ed.*, 2012, **51**, 2618-2622.
- [S16] X. Ding, J. Guo, X. Feng, Y. Honsho, J. Guo, S. Seki, P. Maitarad, A. Saeki, S. Nagase and D. Jiang, *Angew. Chem. Int. Ed.*, 2011, **50**, 1289-1293.
- [S17] S. Dalapati, M. Addicoat, S. Jin, T. Sakurai, J. Gao, H. Xu, S. Irle, S. Seki and D. Jiang, *Nat. Commun.*, 2015, **6**, 7786.
- [S18] X. Ding, L. Chen, Y. Honsho, X. Feng, O. Saengsawang, J. Guo, A. Saeki, S. Seki, S. Irle, S. Nagase, V. Parasuk and D. Jiang, *J. Am. Chem. Soc.*, 2011, **133**, 14510-14513.
- [S19] X. Feng, L. Chen, Y. Honsho, O. Saengsawang, L. Liu, L. Wang, A. Saeki, S. Irle, S. Seki, Y. Dong and D. Jiang, *Adv. Mater.*, 2012, **24**, 3026-3031.
